# Supplementary material for: A Case of Adenoid Cystic Carcinoma Mimicking a Bartholin Cyst and Literature Review
Source: Case Rep Obstet Gynecol. 2018 Mar 26;2018:5256876. doi: 10.1155/2018/5256876 (PMC5892282; doi:10.1155/2018/5256876)
Supplement: Supplementary Materials — (1) Contrast CT showing an irregular area on the left perineum consistent with recent biopsy. (2) H&E stain of the tumour showing (A) perineural invasion and (B) cribriform-tubular arrangement of tumour cells around acellular spaces and pseudomucinous basement membrane. [file 5256876.f1.zip]

Archive with 5 entries (4 files):
- 5256876.f1/
- 5256876.f1/CT_CRIOG_2207408.docx
- 5256876.f1/path slide 1_CRIOG_2207409.docx
- 5256876.f1/path slide 2_CRIOG_2207410.docx
- 5256876.f1/supplementary materials_CRIOG_2207411.docx
